# Supplementary material for: Metabolic control analysis of hepatic glycogen synthesis in vivo
Source: PubMed Central journal article supplement — Proc Natl Acad Sci U S A. 2020 Mar 18;117(14):8166–76. doi: 10.1073/pnas.1921694117 (PMC7149488; doi:10.1073/pnas.1921694117), 2020-03-18
Supplement: pnas.1921694117.sd01.pdf [file pnas.1921694117.sd01.pdf]

| 0.5/180 | 4.0/100 | 4.0/180 | 4.0/300 | 4.0/400 |
|---------|---------|---------|---------|---------|
| 0.05    | 0.00    | 0.04    | 0.23    | 0.56    |
| 0.04    | 0.01    | 0.10    | 0.37    | 0.63    |
| 0.04    | 0.01    | 0.08    | 0.36    | 0.60    |
| 0.04    | 0.02    | 0.03    | 0.39    |         |
| 0.05    | 0.02    | 0.07    | 0.49    |         |
|         | 0.04    | 0.05    | 0.36    |         |
|         | 0.02    | 0.09    | 0.44    |         |
|         | 0.07    | 0.05    | 0.31    |         |
|         | 0.01    | 0.08    | 0.38    |         |
|         |         |         | 0.23    |         |

| 0.5/180 | 4.0/100 | 4.0/180 | 4.0/300 | 4.0/400 |
|---------|---------|---------|---------|---------|
| 0.06    | 0.15    | 0.16    | 0.23    | 0.23    |
| 0.06    | 0.01    | 0.14    | 0.19    | 0.11    |
| 0.08    | 0.03    | 0.06    | 0.21    | 0.20    |
| 0.06    | 0.01    | 0.08    | 0.26    |         |
| 0.06    | 0.05    | 0.12    | 0.18    |         |
|         | 0.12    | 0.10    | 0.27    |         |
|         | 0.10    | 0.12    | 0.17    |         |
|         | 0.09    | 0.07    | 0.19    |         |
|         | 0.17    | 0.11    | 0.07    |         |
|         |         |         | 0.13    |         |

A

RC-fed

| Glucose(mM) | Glycogen Synthesis via Direct Pathway |
|-------------|---------------------------------------|
| 9.6         | 0.12                                  |
| 15.0        | 0.73                                  |
| 9.5         | 0.10                                  |
| 18.9        | 0.66                                  |
| 18.5        | 0.57                                  |
| 11.4        | 0.02                                  |
| 9.8         | 0.15                                  |
| 14.7        | 0.75                                  |
| 14.5        | 0.27                                  |
| 19.7        | 0.50                                  |
| 15.2        | 0.50                                  |
| 10.8        | 0.09                                  |
| 8.4         | 0.26                                  |
| 13.8        | 0.42                                  |
| 8.3         | 0.12                                  |
| 19.1        | 0.58                                  |
| 14.4        | 0.68                                  |
| 9.2         | 0.12                                  |
| 11.2        | 0.15                                  |
| 15.8        | 0.37                                  |
| 15.1        | 0.56                                  |
| 9.7         | 0.09                                  |
| 9.2         | 0.23                                  |
| 4.2         | 0.04                                  |
| 4.6         | 0.00                                  |
| 4.7         | 0.01                                  |
| 9.5         | 0.01                                  |
| 9.6         | 0.01                                  |
| 5.8         | 0.08                                  |
| 5.8         | 0.07                                  |

HFD-fed

| Glucose(mM) | Glycogen Synthesis via Direct Pathway |
|-------------|---------------------------------------|
| 4.8         | 0.07                                  |
| 6.7         | 0.01                                  |
| 8.8         | 0.10                                  |
| 5.5         | 0.01                                  |
| 10.9        | 0.08                                  |
| 15.5        | 0.36                                  |
| 4.2         | 0.01                                  |
| 10.7        | 0.03                                  |
| 15.8        | 0.36                                  |
| 5.6         | 0.02                                  |
| 9.0         | 0.07                                  |
| 16.2        | 0.39                                  |
| 10.0        | 0.05                                  |
| 11.1        | 0.09                                  |
| 15.2        | 0.37                                  |
| 9.2         | 0.05                                  |
| 19.6        | 0.44                                  |
| 10.4        | 0.08                                  |
| 18.6        | 0.31                                  |
| 14.0        | 0.23                                  |
| 23.0        | 0.56                                  |
| 21.9        | 0.63                                  |
| 20.5        | 0.60                                  |

B

RC-fed

| G6P(mM) | Net Glycogen Synthetic Rate |
|---------|-----------------------------|
| 0.87    | 0.89                        |
| 0.44    | 0.24                        |
| 0.88    | 0.82                        |
| 0.54    | 0.34                        |
| 1.06    | 0.95                        |

HFD-fed

| G6P(mM) | Net Glycogen Synthetic Rate |
|---------|-----------------------------|
| 0.50    | 0.36                        |
| 0.17    | 0.02                        |
| 0.34    | 0.11                        |
| 0.30    | 0.04                        |
| 0.44    | 0.55                        |

|      |      |
|------|------|
| 0.59 | 0.81 |
| 0.87 | 0.64 |
| 0.55 | 0.49 |
| 0.44 | 0.24 |
| 0.58 | 0.72 |
| 0.68 | 0.87 |
| 0.44 | 0.21 |
| 0.72 | 0.60 |
| 0.40 | 0.17 |
| 0.36 | 0.15 |
| 0.38 | 0.13 |
| 0.44 | 0.21 |
| 0.35 | 0.15 |

|      |      |
|------|------|
| 0.44 | 0.03 |
| 0.38 | 0.19 |
| 0.33 | 0.07 |
| 0.37 | 0.14 |
| 0.65 | 0.57 |
| 0.35 | 0.15 |
| 0.40 | 0.24 |
| 0.62 | 0.56 |
| 0.45 | 0.12 |
| 0.40 | 0.21 |
| 0.65 | 0.79 |
| 0.67 | 0.74 |
| 0.88 | 0.80 |

A

Peripheral Infusion

| Glucose(mM) | Glycogen Synthesis via Direct Pathway |
|-------------|---------------------------------------|
| 11.3        | 0.23                                  |
| 9.0         | 0.08                                  |
| 8.8         | 0.10                                  |
| 7.7         | 0.05                                  |
| 10.0        | 0.13                                  |
| 4.7         | 0.03                                  |
| 4.6         | 0.00                                  |
| 4.4         | 0.00                                  |
| 9.6         | 0.10                                  |
| 9.5         | 0.10                                  |
| 9.8         | 0.15                                  |
| 10.8        | 0.11                                  |
| 12.7        | 0.18                                  |
| 8.4         | 0.26                                  |
| 8.3         | 0.12                                  |
| 9.2         | 0.09                                  |
| 11.2        | 0.15                                  |
| 9.7         | 0.09                                  |
| 9.2         | 0.23                                  |
| 10.6        | 0.24                                  |
| 10.5        | 0.31                                  |
| 16.5        | 0.49                                  |
| 15.4        | 0.41                                  |
| 15.4        | 0.55                                  |
| 13.1        | 0.62                                  |
| 15.8        | 1.15                                  |
| 18.5        | 0.57                                  |

Portal Infusion

| Glucose(mM) | Glycogen Synthesis via Direct Pathway |
|-------------|---------------------------------------|
| 10.3        | 0.48                                  |
| 9.7         | 0.39                                  |
| 10.2        | 0.47                                  |
| 14.0        | 0.57                                  |
| 9.4         | 0.36                                  |
| 6.2         | 0.13                                  |
| 6.7         | 0.14                                  |
| 6.8         | 0.13                                  |
| 13.4        | 0.67                                  |
| 11.8        | 0.63                                  |
| 20.4        | 0.65                                  |
| 13.6        | 0.65                                  |
| 17.7        | 0.76                                  |
| 10.8        | 0.66                                  |

B

Peripheral Infusion

| G6P(mM) | Net Glycogen Synthetic Rate |
|---------|-----------------------------|
| 0.53    | 0.65                        |
| 0.42    | 0.20                        |
| 0.38    | 0.30                        |
| 0.41    | 0.12                        |
| 0.49    | 0.26                        |
| 0.28    | 0.09                        |
| 0.35    | 0.14                        |
| 0.49    | 0.55                        |

Portal Infusion

| G6P(mM) | Net Glycogen Synthetic Rate |
|---------|-----------------------------|
| 0.51    | 0.66                        |
| 0.56    | 0.41                        |
| 0.56    | 0.44                        |
| 0.60    | 0.74                        |
| 0.64    | 0.74                        |
| 0.54    | 0.98                        |
| 0.71    | 0.56                        |
| 0.40    | 0.18                        |

|      |      |
|------|------|
| 0.60 | 0.72 |
| 0.83 | 0.54 |
| 1.07 | 0.83 |
| 1.06 | 0.75 |
| 1.01 | 1.53 |
| 0.88 | 0.75 |
| 1.21 | 0.80 |

|      |      |
|------|------|
| 0.41 | 0.22 |
| 0.48 | 0.15 |
| 1.57 | 0.89 |
| 0.73 | 0.99 |
| 1.14 | 0.81 |
| 0.83 | 0.93 |
| 1.06 | 0.78 |

CTR-ASO GCK-ASO

Direct

|      |      |
|------|------|
| 0.26 | 0.15 |
| 0.10 | 0.07 |
| 0.15 | 0.13 |
| 0.36 | 0.21 |
| 0.23 | 0.15 |
| 0.19 | 0.18 |
| 0.21 | 0.06 |
|      | 0.10 |
|      | 0.16 |

Indirect

|      |      |
|------|------|
| 0.09 | 0.17 |
| 0.05 | 0.07 |
| 0.10 | 0.15 |
| 0.22 | 0.20 |
| 0.14 | 0.15 |
| 0.21 | 0.23 |
| 0.15 | 0.10 |
|      | 0.14 |
|      | 0.24 |

A

|         |      |
|---------|------|
| 0.5/100 | 0.79 |
| 0.5/100 | 0.84 |
| 0.5/100 | 1.33 |
| 0.5/100 | 1.25 |
| 0.5/100 | 1.12 |
| 0.5/100 | 0.70 |
| 0.5/180 | 1.10 |
| 0.5/180 | 1.06 |
| 0.5/180 | 1.25 |
| 0.5/180 | 0.70 |
| 0.5/180 | 0.94 |
| 0.5/180 | 1.31 |
| 4.0/100 | 1.02 |
| 4.0/100 | 0.76 |
| 4.0/100 | 1.40 |
| 4.0/100 | 0.88 |
| 4.0/100 | 0.67 |
| 4.0/100 | 1.20 |
| 4.0/180 | 1.85 |
| 4.0/180 | 1.50 |
| 4.0/180 | 1.76 |
| 4.0/180 | 1.13 |
| 4.0/180 | 1.33 |
| 4.0/180 | 1.40 |
| 4.0/300 | 2.72 |
| 4.0/300 | 1.82 |
| 4.0/300 | 2.31 |
| 4.0/300 | 2.90 |
| 4.0/300 | 2.45 |
| 4.0/300 | 2.08 |

B

|                |      |
|----------------|------|
| RC-fed 0.5/180 | 0.69 |
| RC-fed 0.5/180 | 0.73 |
| RC-fed 0.5/180 | 0.97 |
| RC-fed 0.5/180 | 1.03 |
| RC-fed 0.5/180 | 0.94 |
| RC-fed 0.5/180 | 1.57 |
| RC-fed 4.0/180 | 1.15 |
| RC-fed 4.0/180 | 1.29 |
| RC-fed 4.0/180 | 2.04 |
| RC-fed 4.0/180 | 2.18 |
| RC-fed 4.0/180 | 1.29 |
| RC-fed 4.0/180 | 1.67 |
| RC-fed 4.0/180 | 1.40 |
| RC-fed 4.0/180 | 1.06 |



|                       |      |
|-----------------------|------|
| HFD-fed 4.0/180       | 0.73 |
| HFD-fed 4.0/180       | 0.66 |
| HFD-fed 4.0/180       | 1.80 |
| HFD-fed 4.0/180       | 1.27 |
| HFD-fed 4.0/180       | 1.35 |
| HFD-fed 4.0/180       | 0.39 |
| HFD-fed 4.0/180       | 0.79 |
| HFD-fed 4.0/180       | 0.50 |
| Portal Infusion 4.0/1 | 1.75 |
| Portal Infusion 4.0/1 | 1.96 |
| Portal Infusion 4.0/1 | 2.79 |
| Portal Infusion 4.0/1 | 2.08 |
| Portal Infusion 4.0/1 | 1.48 |
| Portal Infusion 4.0/1 | 1.65 |
| Portal Infusion 4.0/1 | 1.78 |
| Portal Infusion 4.0/1 | 2.25 |

Body Wight

| RC-fed |        |        |        |        |
|--------|--------|--------|--------|--------|
| Group1 | Group2 | Group3 | Group4 | Group5 |
| 412    | 421    | 449    | 449    | 454    |
| 409    | 402    | 431    | 402    | 468    |
| 380    | 399    | 450    | 431    | 427    |
|        | 429    | 454    | 421    | 424    |
|        | 446    | 431    | 396    | 412    |
|        | 426    | 395    | 381    | 405    |
|        |        | 363    | 458    | 398    |
|        |        | 340    | 435    | 367    |
|        |        | 386    | 456    | 415    |
|        |        |        | 428    | 432    |
|        |        |        | 440    | 422    |
|        |        |        | 436    | 448    |
|        |        |        | 361    | 353    |

| HFD-fed |        |
|---------|--------|
| Group1  | Group2 |
| 409     | 399    |
| 415     | 420    |
| 393     | 411    |
|         | 396    |
|         | 395    |
|         |        |
|         |        |
|         |        |
|         |        |
|         |        |

Liver TG

| RC-fed |        |        |        |        |
|--------|--------|--------|--------|--------|
| Group1 | Group2 | Group3 | Group4 | Group5 |
| 5      | 9      | 9      | 11     | 5      |
| 7      | 13     | 7      | 6      | 11     |
| 9      | 9      | 6      | 8      | 9      |
|        | 4      | 6      | 7      | 12     |
|        | 6      | 3      | 7      | 8      |
|        | 9      | 4      | 8      | 6      |
|        |        | 10     | 9      | 7      |
|        |        | 8      | 3      | 6      |
|        |        |        | 7      | 9      |
|        |        |        |        | 7      |

| HFD-fed |        |
|---------|--------|
| Group1  | Group2 |
| 15      | 23     |
| 18      | 15     |
| 18      | 17     |
|         | 23     |
|         | 17     |

Plasma Human Insulin

0 min.

| RC-fed |        |        |        |        |
|--------|--------|--------|--------|--------|
| Group1 | Group2 | Group3 | Group4 | Group5 |
| 0.0    | 0.0    | 0.0    | 0.0    | 0.0    |
| 0.0    | 0.0    | 0.0    | 0.0    | 0.0    |
| 0.0    | 0.0    | 0.0    | 0.0    | 0.0    |

| HFD-fed |        |
|---------|--------|
| Group1  | Group2 |
| 0.0     | 0.0    |
| 0.0     | 0.0    |
| 0.0     | 0.0    |

30 min.

| RC-fed |        |        |        |        |
|--------|--------|--------|--------|--------|
| Group1 | Group2 | Group3 | Group4 | Group5 |
| 5.8    | 7.7    | 49     | 54     | 70     |
| 5.6    | 6.4    | 74     | 79     | 82     |
| 6.7    | 5.1    | 71     | 66     | 95     |
|        | 6.2    | 88     | 81     | 65     |
|        | 5.1    | 79     | 80     | 70     |

| HFD-fed |        |
|---------|--------|
| Group1  | Group2 |
| 10      | 7.2    |
| 6.7     | 4.7    |
| 2.4     | 6.8    |
|         | 8.4    |
|         | 5.7    |

|  |     |  |    |    |
|--|-----|--|----|----|
|  | 5.3 |  | 60 | 67 |
|  |     |  | 83 | 59 |
|  |     |  | 73 | 57 |
|  |     |  | 79 | 77 |
|  |     |  |    | 92 |

90 min.

RC-fed

| Group1 | Group2 | Group3 | Group4 | Group5 |
|--------|--------|--------|--------|--------|
| 10.1   | 12     | 81     | 69     | 72     |
| 6.8    | 7.4    | 77     | 80     | 94     |
| 7.7    | 7.8    | 64     | 98     | 106    |
|        | 7.8    | 77     | 67     | 113    |
|        | 5.3    | 114    | 83     | 75     |
|        | 9.7    |        | 74     | 86     |
|        |        |        | 86     | 72     |
|        |        |        | 82     | 69     |

HFD-fed

| Group1 | Group2 |
|--------|--------|
| 11.4   | 9.5    |
| 4.9    | 6.1    |
| 8.6    | 7.0    |
|        | 13.7   |
|        | 7.6    |

Plasma Rat C-peptide

0 min.

RC-fed

| Group1 | Group2 | Group3 | Group4 | Group5 |
|--------|--------|--------|--------|--------|
| 386    | 641    | 438    | 764    | 771    |
| 543    | 514    | 492    | 457    | 533    |
| 429    | 257    | 495    | 321    | 492    |
|        | 310    |        | 367    | 248    |
|        |        |        |        | 333    |
|        |        |        |        | 565    |

HFD-fed

| Group1 | Group2 |
|--------|--------|
| 662    | 492    |
| 397    | 437    |
| 446    | 383    |
|        | 633    |
|        |        |

90 min.

RC-fed

| Group1 | Group2 | Group3 | Group4 | Group5 |
|--------|--------|--------|--------|--------|
| 2      | 13     | 21     | 3      | 18     |
| 1      | 0      | 0      | 0      | 9      |
| 0      | 0      | 0      | 0      | 0      |
|        | 0      |        | 0      | 0      |
|        |        |        |        | 0      |

HFD-fed

| Group1 | Group2 |
|--------|--------|
| 4      | 21     |
| 0      | 10     |
| 0      | 0      |
|        |        |
|        |        |

| Group3 | Group4 | Group5 | 4.0/400 |
|--------|--------|--------|---------|
| 397    | 412    | 396    | 389     |
| 417    | 423    | 419    | 381     |
| 409    | 419    | 395    | 434     |
| 398    | 399    | 428    |         |
| 395    | 425    | 415    |         |
| 392    | 384    | 379    |         |
| 383    | 394    | 433    |         |
| 431    | 406    | 410    |         |
| 458    | 445    | 393    |         |
|        |        | 396    |         |

| Group3 | Group4 | Group5 | 4.0/400 |
|--------|--------|--------|---------|
| 16     | 27     | 15     | 17      |
| 14     | 11     | 14     | 21      |
| 16     | 12     | 19     | 15      |
| 29     | 19     | 20     |         |
|        |        |        |         |

| Group3 | Group4 | Group5 | 4.0/400 |
|--------|--------|--------|---------|
| 0.0    | 0.0    | 0.0    | 0.0     |
| 0.0    | 0.0    | 0.0    | 0.0     |
| 0.0    | 0.0    | 0.0    | 0.0     |

| Group3 | Group4 | Group5 | 4.0/400 |
|--------|--------|--------|---------|
| 74     | 70     | 65     | 51      |
| 69     | 86     | 77     | 90      |
| 70     | 60     | 70     | 85      |
| 80     | 69     | 71     |         |
|        | 69     | 85     |         |

| Group3 | Group4 | Group5 | 4.0/400 |
|--------|--------|--------|---------|
| 81     | 90     | 69     | 87      |
| 83     | 97     | 80     | 74      |
| 75     | 62     | 77     | 85      |
| 90     | 74     | 81     |         |
|        | 74     | 95     |         |

| Group3 | Group4 | Group5 | 4.0/400 |
|--------|--------|--------|---------|
| 423    | 458    | 515    | 388     |
| 474    | 339    | 630    | 472     |
| 530    | 513    | 449    | 621     |
| 726    | 597    | 609    |         |
|        |        | 490    |         |

| Group3 | Group4 | Group5 | 4.0/400 |
|--------|--------|--------|---------|
| 8      | 5      | 10     | 3       |
| 0      | 2      | 6      | 0       |
| 0      | 0      | 0      | 0       |
| 0      | 0      | 0      |         |
|        |        | 0      |         |

Body Wight

Peripheral Infusion

| Group1 | Group2 | Group3 | Group4 | Group5 |
|--------|--------|--------|--------|--------|
| 403    | 401    | 420    | 424    | 425    |
| 378    | 339    | 377    | 398    | 403    |
| 407    | 423    | 334    | 379    | 385    |
|        | 433    | 389    | 428    | 408    |
|        |        |        | 425    | 370    |
|        |        |        | 441    | 397    |
|        |        |        | 395    |        |
|        |        |        | 384    |        |
|        |        |        | 400    |        |
|        |        |        | 384    |        |
|        |        |        | 363    |        |
|        |        |        | 376    |        |
|        |        |        | 407    |        |
|        |        |        | 444    |        |
|        |        |        | 398    |        |
|        |        |        | 409    |        |
|        |        |        | 456    |        |
|        |        |        | 434    |        |

Portal Infusion

| Group1 | Group2 |
|--------|--------|
| 401    | 402    |
| 380    | 360    |
| 416    | 385    |
|        | 433    |
|        |        |
|        |        |
|        |        |

Plasma Human Insulin

0 min.

Peripheral Infusion

| Group1 | Group2 | Group3 | Group4 | Group5 |
|--------|--------|--------|--------|--------|
| 0.0    | 0.0    | 0.0    | 0.0    | 0.0    |
| 0.0    | 0.0    | 0.0    | 0.0    | 0.0    |
| 0.0    | 0.0    | 0.0    | 0.0    | 0.0    |

Portal Infusion

| Group1 | Group2 |
|--------|--------|
| 0.0    | 0.0    |
| 0.0    | 0.0    |
| 0.0    | 0.0    |

30 min.

Peripheral Infusion

| Group1 | Group2 | Group3 | Group4 | Group5 |
|--------|--------|--------|--------|--------|
| 8.4    | 7.4    | 58     | 80     | 75     |
| 4.4    | 8.6    | 69     | 74     | 86     |
| 7.3    | 4.7    | 74     | 62     | 66     |
|        |        | 87     | 92     | 73     |

Portal Infusion

| Group1 | Group2 |
|--------|--------|
| 8.6    | 6.8    |
| 6.3    | 8.0    |
| 5.5    | 6.2    |
|        |        |

90 min.

Peripheral Infusion

| Group1 | Group2 | Group3 | Group4 | Group5 |
|--------|--------|--------|--------|--------|
| 8.5    | 9.3    | 82     | 83     | 73     |
| 9.1    | 8.7    | 77     | 71     | 88     |
| 7.6    | 6.9    | 74     | 93     | 80     |
|        |        | 99     | 89     | 83     |

Portal Infusion

| Group1 | Group2 |
|--------|--------|
| 9.2    | 6.7    |
| 8.5    | 8.7    |
| 6.9    | 8.0    |
|        |        |

Plasma Rat C-peptide

0 min.

Peripheral Infusion

| Group1 | Group2 | Group3 | Group4 | Group5 |
|--------|--------|--------|--------|--------|
| 418    | 367    | 513    | 472    | 467    |
| 424    | 406    | 394    | 436    | 430    |
| 436    | 496    | 446    | 367    | 481    |
|        |        | 387    | 420    | 380    |

Portal Infusion

| Group1 | Group2 |
|--------|--------|
| 465    | 520    |
| 437    | 395    |
| 403    | 450    |
|        |        |

90 min.

Peripheral Infusion

| Group1 | Group2 | Group3 | Group4 | Group5 |
|--------|--------|--------|--------|--------|
| 7      | 14     | 3      | 11     | 11     |
| 0      | 1      | 5      | 0      | 1      |
| 8      | 0      | 13     | 18     | 12     |
|        |        | 5      | 4      | 0      |

Portal Infusion

| Group1 | Group2 |
|--------|--------|
| 8      | 0      |
| 10     | 4      |
| 12     | 20     |
|        |        |

| Group3 | Group4 | Group5 |
|--------|--------|--------|
| 395    | 392    | 419    |
| 382    | 415    | 412    |
| 381    | 398    | 376    |
| 378    | 384    | 406    |
|        | 424    | 399    |
|        | 395    | 405    |
|        | 448    | 391    |

| Group3 | Group4 | Group5 |
|--------|--------|--------|
| 0.0    | 0.0    | 0.0    |
| 0.0    | 0.0    | 0.0    |
| 0.0    | 0.0    | 0.0    |

| Group3 | Group4 | Group5 |
|--------|--------|--------|
| 82     | 83     | 97     |
| 76     | 67     | 82     |
| 68     | 65     | 57     |
| 62     | 87     | 60     |

| Group3 | Group4 | Group5 |
|--------|--------|--------|
| 87     | 93     | 76     |
| 74     | 81     | 74     |
| 86     | 79     | 88     |
| 77     | 83     | 94     |



| Group3 | Group4 | Group5 |
|--------|--------|--------|
| 427    | 448    | 415    |
| 436    | 367    | 430    |
| 393    | 449    | 383    |
| 444    | 400    | 496    |

| Group3 | Group4 | Group5 |
|--------|--------|--------|
| 0      | 19     | 2      |
| 4      | 0      | 5      |
| 9      | 0      | 7      |
| 0      | 8      | 4      |
